# Supplementary material for: The ameliorative effect of pioglitazone against colistin-induced nephrotoxicity is mediated by inhibition of NF-κB and restoration of Nrf2 signaling: An integrative bioinformatics prediction-guided in vitro study
Source: PubMed Central journal article supplement (PMC11611169; doi:10.1371/journal.pone.0314092), 2024-12-02

Experiment 1

|   | 1     | 2     | 3     | 4     | 5     | 6     |
|---|-------|-------|-------|-------|-------|-------|
| A | 0.049 | 0.039 | 0.04  | 0.039 | 0.04  | 0.039 |
| B | 0.042 | 0.041 | 0.114 | 0.043 | 0.041 | 0.041 |
| C | 0.042 | 0.623 | 0.704 | 0.6   | 0.57  | 0.747 |
| D | 0.048 | 0.573 | 0.705 | 0.738 | 0.714 | 0.569 |
| E | 0.04  | 0.537 | 0.603 | 0.548 | 0.67  | 0.598 |
| F | 0.04  | 0.04  | 0.048 | 0.042 | 0.04  | 0.041 |
| G | 0.041 | 0.043 | 0.053 | 0.041 | 0.04  | 0.041 |
| H | 0.041 | 0.042 | 0.048 | 0.042 | 0.045 | 0.043 |

Experiment 2

|   | 1     | 2     | 3     | 4     | 5     | 6     |
|---|-------|-------|-------|-------|-------|-------|
| A | 0.04  | 0.04  | 0.04  | 0.039 | 0.039 | 0.039 |
| B | 0.04  | 0.042 | 0.041 | 0.04  | 0.041 | 0.04  |
| C | 0.041 | 0.432 | 0.584 | 0.54  | 0.511 | 0.634 |
| D | 0.041 | 0.445 | 0.59  | 0.497 | 0.449 | 0.523 |
| E | 0.042 | 0.363 | 0.535 | 0.512 | 0.52  | 0.535 |
| F | 0.04  | 0.041 | 0.04  | 0.048 | 0.045 | 0.04  |
| G | 0.05  | 0.041 | 0.039 | 0.04  | 0.041 | 0.04  |
| H | 0.042 | 0.042 | 0.045 | 0.043 | 0.042 | 0.041 |

Experiment 3

|   | 1     | 2     | 3     | 4     | 5     | 6     |
|---|-------|-------|-------|-------|-------|-------|
| A | 0.039 | 0.041 | 0.041 | 0.038 | 0.037 | 0.041 |
| B | 0.04  | 0.041 | 0.042 | 0.041 | 0.042 | 0.041 |
| C | 0.042 | 0.399 | 0.592 | 0.52  | 0.535 | 0.518 |
| D | 0.037 | 0.421 | 0.543 | 0.56  | 0.441 | 0.432 |
| E | 0.039 | 0.398 | 0.562 | 0.512 | 0.462 | 0.571 |
| F | 0.041 | 0.042 | 0.041 | 0.049 | 0.044 | 0.041 |
| G | 0.042 | 0.043 | 0.039 | 0.04  | 0.041 | 0.041 |
| H | 0.041 | 0.043 | 0.046 | 0.042 | 0.041 | 0.042 |

| 7     | 8     | 9     | 10    | 11    | 12    |
|-------|-------|-------|-------|-------|-------|
| 0.039 | 0.039 | 0.04  | 0.04  | 0.039 | 0.042 |
| 0.04  | 0.04  | 0.04  | 0.041 | 0.04  | 0.04  |
| 0.605 | 0.429 | 0.334 | 0.165 | 0.093 | 0.04  |
| 0.643 | 0.439 | 0.265 | 0.122 | 0.083 | 0.04  |
| 0.655 | 0.39  | 0.274 | 0.114 | 0.069 | 0.041 |
| 0.043 | 0.04  | 0.062 | 0.052 | 0.074 | 0.04  |
| 0.04  | 0.043 | 0.061 | 0.05  | 0.059 | 0.04  |
| 0.042 | 0.044 | 0.042 | 0.042 | 0.041 | 0.041 |

| 7     | 8     | 9     | 10    | 11    | 12    |
|-------|-------|-------|-------|-------|-------|
| 0.04  | 0.04  | 0.04  | 0.039 | 0.04  | 0.039 |
| 0.044 | 0.04  | 0.04  | 0.04  | 0.043 | 0.04  |
| 0.516 | 0.371 | 0.314 | 0.13  | 0.122 | 0.04  |
| 0.508 | 0.372 | 0.278 | 0.12  | 0.108 | 0.041 |
| 0.435 | 0.296 | 0.225 | 0.094 | 0.087 | 0.04  |
| 0.04  | 0.039 | 0.043 | 0.042 | 0.041 | 0.039 |
| 0.04  | 0.04  | 0.055 | 0.051 | 0.048 | 0.039 |
| 0.042 | 0.041 | 0.043 | 0.048 | 0.042 | 0.041 |

| 7     | 8     | 9     | 10    | 11    | 12    |
|-------|-------|-------|-------|-------|-------|
| 0.041 | 0.042 | 0.04  | 0.039 | 0.041 | 0.039 |
| 0.046 | 0.046 | 0.046 | 0.041 | 0.042 | 0.041 |
| 0.519 | 0.362 | 0.201 | 0.081 | 0.041 | 0.041 |
| 0.511 | 0.379 | 0.203 | 0.091 | 0.059 | 0.041 |
| 0.421 | 0.333 | 0.2   | 0.099 | 0.058 | 0.041 |
| 0.042 | 0.038 | 0.044 | 0.041 | 0.042 | 0.038 |
| 0.042 | 0.041 | 0.052 | 0.049 | 0.042 | 0.042 |
| 0.043 | 0.042 | 0.042 | 0.041 | 0.041 | 0.049 |

| Blank | Colistin | SFM        | 500 uM     | 750 uM     | 1000 uM    | 1500 uM    |
|-------|----------|------------|------------|------------|------------|------------|
| 0.041 |          | 0.704      | 0.605      | 0.429      | 0.334      | 0.165      |
| 0.043 |          | 0.705      | 0.643      | 0.439      | 0.265      | 0.122      |
| 0.04  |          | 0.623      | 0.655      | 0.39       | 0.274      | 0.114      |
| 0.062 |          |            |            |            |            |            |
| 0.052 |          | 0.652      | 0.553      | 0.377      | 0.282      | 0.113      |
| 0.074 |          | 0.653      | 0.591      | 0.387      | 0.213      | 0.07       |
| 0.052 |          | 0.571      | 0.603      | 0.338      | 0.222      | 0.062      |
|       |          | 0.62533333 | 0.58233333 | 0.36733333 | 0.239      | 0.08166667 |
|       |          | 104.264448 | 88.432883  | 60.2878786 | 45.0959729 | 18.0703721 |
|       |          | 104.424363 | 94.5096453 | 61.8870266 | 34.0618518 | 11.1940358 |
|       |          | 91.3113493 | 96.4286228 | 54.0512015 | 35.501085  | 9.91471744 |
|       |          | 100.000053 | 93.123717  | 58.7420356 | 38.2196366 | 13.0597085 |

| Blank      | Colistin | SFM        | 500 uM     | 750 uM     | 1000 uM    | 1500 uM    |
|------------|----------|------------|------------|------------|------------|------------|
| 0.04       |          | 0.584      | 0.516      | 0.371      | 0.314      | 0.13       |
| 0.04       |          | 0.59       | 0.508      | 0.372      | 0.278      | 0.12       |
| 0.039      |          | 0.535      | 0.435      | 0.296      | 0.225      | 0.094      |
| 0.043      |          |            |            |            |            |            |
| 0.042      |          | 0.54316667 | 0.47516667 | 0.33016667 | 0.27316667 | 0.08916667 |
| 0.041      |          | 0.54916667 | 0.46716667 | 0.33116667 | 0.23716667 | 0.07916667 |
| 0.04083333 |          | 0.49416667 | 0.39416667 | 0.25516667 | 0.18416667 | 0.05316667 |
|            |          | 0.52883334 | 0.4455     | 0.3055     | 0.2315     | 0.07383334 |
|            |          | 102.710368 | 89.8518747 | 62.4330285 | 51.6545855 | 16.8610152 |
|            |          | 103.844941 | 88.3391108 | 62.622124  | 44.8471479 | 14.9700603 |
|            |          | 93.444689  | 74.5351399 | 48.2508667 | 34.8250869 | 10.0535776 |
|            |          | 99.9999994 | 84.2420418 | 57.7686731 | 43.7756068 | 13.961551  |

| Blank      | Colistin | SFM        | 500 uM     | 750 uM     | 1000 uM    | 1500 uM    |
|------------|----------|------------|------------|------------|------------|------------|
| 0.041      |          | 0.592      | 0.519      | 0.362      | 0.201      | 0.081      |
| 0.042      |          | 0.543      | 0.511      | 0.379      | 0.203      | 0.091      |
| 0.038      |          | 0.562      | 0.421      | 0.333      | 0.2        | 0.099      |
| 0.044      |          | 0.56566667 | 0.48366667 | 0.358      | 0.20133333 | 0.09033333 |
| 0.041      |          | 104.655273 | 91.7501468 | 63.9952854 | 35.5332938 | 14.3193871 |
| 0.042      |          | 95.9929281 | 90.3358863 | 67.0005889 | 35.886859  | 16.0872126 |
| 0.04133333 |          | 99.3517967 | 74.4254562 | 58.8685913 | 35.3565113 | 17.5014731 |
|            |          | 99.9999994 | 85.5038298 | 63.2881552 | 35.5922214 | 15.9693576 |

2000 uM

|       |
|-------|
| 0.093 |
| 0.083 |
| 0.069 |

0.041

0.031

0.017

0.02966667

6.55650669

4.95735872

2.71855156

4.74413899

2000 uM

|       |
|-------|
| 0.122 |
| 0.108 |
| 0.087 |

0.08116667

0.06716667

0.04616667

0.06483334

15.3482513

12.7009144

8.72990912

12.2596916

2000 uM

|       |
|-------|
| 0.041 |
| 0.059 |
| 0.058 |

0.05266667

7.24808481

10.4301708

10.2533883

9.31054797

Experiment 1

|   | 1     | 2     | 3     | 4     | 5     | 6     |
|---|-------|-------|-------|-------|-------|-------|
| A | 0.042 | 0.039 | 0.039 | 0.038 | 0.04  | 0.043 |
| B | 0.04  | 0.041 | 0.043 | 0.042 | 0.041 | 0.041 |
| C | 0.04  | 0.34  | 0.311 | 0.116 | 0.162 | 0.237 |
| D | 0.04  | 0.378 | 0.303 | 0.115 | 0.127 | 0.224 |
| E | 0.04  | 0.389 | 0.337 | 0.113 | 0.119 | 0.19  |
| F | 0.04  | 0.035 | 0.044 | 0.036 | 0.041 | 0.046 |
| G | 0.039 | 0.04  | 0.038 | 0.042 | 0.041 | 0.037 |
| H | 0.039 | 0.042 | 0.037 | 0.043 | 0.042 | 0.045 |

Experiment 2

|   | 1     | 2     | 3     | 4     | 5     | 6     |
|---|-------|-------|-------|-------|-------|-------|
| A | 0.04  | 0.04  | 0.039 | 0.04  | 0.04  | 0.038 |
| B | 0.037 | 0.044 | 0.039 | 0.041 | 0.038 | 0.043 |
| C | 0.04  | 0.311 | 0.287 | 0.092 | 0.107 | 0.123 |
| D | 0.044 | 0.262 | 0.24  | 0.1   | 0.077 | 0.153 |
| E | 0.04  | 0.249 | 0.248 | 0.1   | 0.111 | 0.127 |
| F | 0.039 | 0.04  | 0.038 | 0.041 | 0.041 | 0.056 |
| G | 0.042 | 0.042 | 0.041 | 0.046 | 0.04  | 0.04  |
| H | 0.041 | 0.049 | 0.042 | 0.044 | 0.04  | 0.042 |

Experiment 3

|   | 1     | 2     | 3     | 4     | 5     | 6     |
|---|-------|-------|-------|-------|-------|-------|
| A | 0.039 | 0.043 | 0.039 | 0.039 | 0.042 | 0.044 |
| B | 0.04  | 0.045 | 0.041 | 0.042 | 0.041 | 0.042 |
| C | 0.039 | 0.333 | 0.286 | 0.113 | 0.131 | 0.227 |
| D | 0.04  | 0.352 | 0.282 | 0.109 | 0.116 | 0.21  |
| E | 0.039 | 0.388 | 0.309 | 0.112 | 0.119 | 0.195 |
| F | 0.04  | 0.039 | 0.04  | 0.041 | 0.041 | 0.049 |
| G | 0.039 | 0.039 | 0.039 | 0.041 | 0.041 | 0.041 |
| H | 0.041 | 0.041 | 0.042 | 0.041 | 0.041 | 0.041 |

| 7     | 8     | 9     | 10    | 11    | 12    |
|-------|-------|-------|-------|-------|-------|
| 0.041 | 0.042 | 0.043 | 0.039 | 0.04  | 0.04  |
| 0.041 | 0.041 | 0.04  | 0.041 | 0.041 | 0.041 |
| 0.267 | 0.219 | 0.226 | 0.25  | 0.238 | 0.041 |
| 0.223 | 0.197 | 0.24  | 0.276 | 0.246 | 0.04  |
| 0.214 | 0.137 | 0.232 | 0.283 | 0.234 | 0.037 |
| 0.055 | 0.057 | 0.084 | 0.08  | 0.101 | 0.042 |
| 0.054 | 0.076 | 0.039 | 0.043 | 0.044 | 0.041 |
| 0.043 | 0.046 | 0.043 | 0.041 | 0.043 | 0.042 |

| 7     | 8     | 9     | 10    | 11    | 12    |
|-------|-------|-------|-------|-------|-------|
| 0.04  | 0.039 | 0.038 | 0.04  | 0.048 | 0.04  |
| 0.042 | 0.04  | 0.039 | 0.041 | 0.043 | 0.043 |
| 0.165 | 0.181 | 0.211 | 0.241 | 0.23  | 0.04  |
| 0.157 | 0.19  | 0.161 | 0.178 | 0.184 | 0.04  |
| 0.131 | 0.215 | 0.159 | 0.212 | 0.189 | 0.039 |
| 0.063 | 0.064 | 0.077 | 0.07  | 0.068 | 0.042 |
| 0.037 | 0.042 | 0.042 | 0.041 | 0.038 | 0.04  |
| 0.043 | 0.043 | 0.041 | 0.038 | 0.039 | 0.038 |

| 7     | 8     | 9     | 10    | 11    | 12    |
|-------|-------|-------|-------|-------|-------|
| 0.04  | 0.042 | 0.041 | 0.04  | 0.041 | 0.04  |
| 0.04  | 0.04  | 0.041 | 0.04  | 0.041 | 0.04  |
| 0.263 | 0.216 | 0.229 | 0.226 | 0.243 | 0.04  |
| 0.221 | 0.185 | 0.305 | 0.218 | 0.241 | 0.04  |
| 0.225 | 0.134 | 0.186 | 0.206 | 0.204 | 0.039 |
| 0.055 | 0.059 | 0.066 | 0.074 | 0.066 | 0.043 |
| 0.045 | 0.07  | 0.04  | 0.039 | 0.04  | 0.04  |
| 0.042 | 0.044 | 0.041 | 0.041 | 0.043 | 0.042 |



| Blank |
|-------|
| 0.046 |
| 0.055 |
| 0.057 |
| 0.084 |
| 0.08  |
| 0.101 |

0.0705

| SFM   | Colistin 1200 | Pio 100 | Pio 150 | Pio 200 |
|-------|---------------|---------|---------|---------|
| 0.34  | 0.116         | 0.237   | 0.219   | 0.25    |
| 0.378 | 0.115         | 0.224   | 0.197   | 0.276   |
| 0.389 | 0.113         | 0.19    | 0.137   | 0.283   |
| 0.311 | 0.162         | 0.267   | 0.226   | 0.238   |
| 0.303 | 0.127         | 0.223   | 0.24    | 0.246   |
| 0.337 | 0.119         | 0.214   | 0.232   | 0.234   |

|            |            |            |            |            |
|------------|------------|------------|------------|------------|
| 0.2695     | 0.0455     | 0.1665     | 0.1485     | 0.1795     |
| 0.3075     | 0.0445     | 0.1535     | 0.1265     | 0.2055     |
| 0.3185     | 0.0425     | 0.1195     | 0.0665     | 0.2125     |
| 0.2405     | 0.0915     | 0.1965     | 0.1555     | 0.1675     |
| 0.2325     | 0.0565     | 0.1525     | 0.1695     | 0.1755     |
| 0.2665     | 0.0485     | 0.1435     | 0.1615     | 0.1635     |
| 0.2725     | 0.05483333 | 0.15533333 | 0.138      | 0.184      |
| 98.8990826 | 16.6972477 | 61.1009174 | 54.4954128 | 65.8715596 |
| 112.844037 | 16.3302752 | 56.3302752 | 46.4220183 | 75.412844  |
| 116.880734 | 15.5963303 | 43.853211  | 24.4036697 | 77.9816514 |
| 88.2568807 | 33.5779817 | 72.1100917 | 57.0642202 | 61.4678899 |
| 85.3211009 | 20.733945  | 55.9633028 | 62.2018349 | 64.4036697 |
| 97.7981651 | 17.7981651 | 52.6605505 | 59.266055  | 60         |
| 100        | 20.1223242 | 57.0030581 | 50.6422018 | 67.5229358 |

| Blank |
|-------|
| 0.056 |
| 0.063 |
| 0.064 |
| 0.077 |
| 0.07  |
| 0.068 |

0.06633333

| SFM   | Colistin 1200 | Pio 100 | Pio 150 | Pio 200 |
|-------|---------------|---------|---------|---------|
| 0.311 | 0.092         | 0.123   | 0.181   | 0.241   |
| 0.262 | 0.1           | 0.153   | 0.19    | 0.178   |
| 0.249 | 0.1           | 0.127   | 0.215   | 0.212   |
| 0.287 | 0.107         | 0.165   | 0.211   | 0.23    |
| 0.24  | 0.077         | 0.157   | 0.161   | 0.184   |
| 0.248 | 0.111         | 0.131   | 0.159   | 0.189   |

|            |            |            |            |            |
|------------|------------|------------|------------|------------|
| 0.24466667 | 0.02566667 | 0.05666667 | 0.11466667 | 0.17466667 |
| 0.19566667 | 0.03366667 | 0.08666667 | 0.12366667 | 0.11166667 |
| 0.18266667 | 0.03366667 | 0.06066667 | 0.14866667 | 0.14566667 |
| 0.22066667 | 0.04066667 | 0.09866667 | 0.14466667 | 0.16366667 |
| 0.17366667 | 0.01066667 | 0.09066667 | 0.09466667 | 0.11766667 |
| 0.18166667 | 0.04466667 | 0.06466667 | 0.09266667 | 0.12266667 |
| 0.19983334 | 0.0315     | 0.07633334 | 0.11983334 | 0.13933334 |
| 122.43536  | 12.8440379 | 28.3569649 | 57.3811507 | 87.4061706 |
| 97.9149275 | 16.8473739 | 43.3694748 | 61.8849037 | 55.8798997 |
| 91.4095065 | 16.8473739 | 30.3586328 | 74.3953286 | 72.8940776 |
| 110.425352 | 20.3502929 | 49.3744788 | 72.3936606 | 81.9015836 |
| 86.9057536 | 5.33778297 | 45.3711428 | 47.3728108 | 58.8824017 |
| 90.9090895 | 22.3519609 | 32.3603008 | 46.3719768 | 61.3844867 |
| 99.9999983 | 15.7631371 | 38.1984991 | 59.9666385 | 69.72477   |

Blank

|       |
|-------|
| 0.049 |
| 0.055 |
| 0.059 |
| 0.066 |
| 0.074 |
| 0.066 |

0.0615

| SFM   | Colistin 1200 | Pio 100 | Pio 150 | Pio 200 |
|-------|---------------|---------|---------|---------|
| 0.333 | 0.113         | 0.227   | 0.216   | 0.226   |
| 0.352 | 0.109         | 0.21    | 0.185   | 0.218   |
| 0.388 | 0.112         | 0.195   | 0.134   | 0.206   |
| 0.286 | 0.131         | 0.263   | 0.229   | 0.243   |
| 0.282 | 0.116         | 0.221   | 0.305   | 0.241   |
| 0.309 | 0.119         | 0.225   | 0.186   | 0.204   |

|            |            |            |            |            |
|------------|------------|------------|------------|------------|
| 0.2715     | 0.0515     | 0.1655     | 0.1545     | 0.1645     |
| 0.2905     | 0.0475     | 0.1485     | 0.1235     | 0.1565     |
| 0.3265     | 0.0505     | 0.1335     | 0.0725     | 0.1445     |
| 0.2245     | 0.0695     | 0.2015     | 0.1675     | 0.1815     |
| 0.2205     | 0.0545     | 0.1595     | 0.2435     | 0.1795     |
| 0.2475     | 0.0575     | 0.1635     | 0.1245     | 0.1425     |
| 0.2635     | 0.05516667 | 0.162      | 0.14766667 | 0.1615     |
| 103.036053 | 19.544592  | 62.8083491 | 58.6337761 | 62.4288425 |
| 110.246679 | 18.0265655 | 56.3567362 | 46.8690702 | 59.3927894 |
| 123.908918 | 19.1650854 | 50.6641366 | 27.5142315 | 54.8387097 |
| 85.199241  | 26.3757116 | 76.4705882 | 63.5673624 | 68.8804554 |
| 83.6812144 | 20.683112  | 60.5313093 | 92.4098672 | 68.1214421 |
| 93.9278937 | 21.8216319 | 62.0493359 | 47.2485769 | 54.0796964 |
| 100        | 20.9361164 | 61.4800759 | 56.0404807 | 61.2903226 |

Experiment 1

| Sample Name         | Target Name | C <sub>T</sub> | C <sub>T</sub> Mean | ΔC <sub>T</sub> Mean | ΔΔC <sub>T</sub> |
|---------------------|-------------|----------------|---------------------|----------------------|------------------|
| CONTROL             | GAPDH       | 18.9729614     |                     |                      |                  |
| CONTROL             | GAPDH       | 18.7619667     |                     |                      |                  |
| CONTROL             | GAPDH       | 18.8933926     | 18.8761069          |                      |                  |
| COLISTIN            | GAPDH       | 18.9320698     |                     |                      |                  |
| COLISTIN            | GAPDH       | 18.9825706     |                     |                      |                  |
| COLISTIN            | GAPDH       | 18.9778538     | 18.9641647          |                      |                  |
| PIOGLITAZONE        | GAPDH       | 18.8215237     |                     |                      |                  |
| PIOGLITAZONE        | GAPDH       | 18.7138729     |                     |                      |                  |
| PIOGLITAZONE        | GAPDH       | 18.7213211     | 18.7522392          |                      |                  |
| COLISTIN+PIOGLITAZO | GAPDH       | 18.6028061     |                     |                      |                  |
| COLISTIN+PIOGLITAZO | GAPDH       | 18.7376232     |                     |                      |                  |
| COLISTIN+PIOGLITAZO | GAPDH       | 18.7209702     | 18.6871332          |                      |                  |
| CONTROL             | IL6         | 22.9370079     |                     |                      |                  |
| CONTROL             | IL6         | 23.10145       |                     |                      |                  |
| CONTROL             | IL6         | 22.2084923     | 22.7489834          | 3.87287649           | 0                |
| COLISTIN            | IL6         | 21.0342751     |                     |                      |                  |
| COLISTIN            | IL6         | 21.8904991     |                     |                      |                  |
| COLISTIN            | IL6         | 22.0874195     | 21.6707312          | 2.70656649           | -1.16631         |
| PIOGLITAZONE        | IL6         | 23.5952759     |                     |                      |                  |
| PIOGLITAZONE        | IL6         | 23.4321346     |                     |                      |                  |
| PIOGLITAZONE        | IL6         | 22.9130878     | 23.3134995          | 4.56126022           | 0.68838374       |
| COLISTIN+PIOGLITAZO | IL6         | 22.3641968     |                     |                      |                  |
| COLISTIN+PIOGLITAZO | IL6         | 21.4979992     |                     |                      |                  |
| COLISTIN+PIOGLITAZO | IL6         | 21.0519676     | 21.6380545          | 2.95092138           | -0.9219551       |

Experiment 2

| Sample Name           | Target Name | C <sub>T</sub> | C <sub>T</sub> Mean | ΔC <sub>T</sub> Mean | ΔΔC <sub>T</sub> |
|-----------------------|-------------|----------------|---------------------|----------------------|------------------|
| CONTROL               | GAPDH       | 17.5905361     |                     |                      |                  |
| CONTROL               | GAPDH       | 17.5360451     |                     |                      |                  |
| CONTROL               | GAPDH       | 17.9317856     | 17.686121           |                      |                  |
| COLISTIN              | GAPDH       | 18.665741      |                     |                      |                  |
| COLISTIN              | GAPDH       | 19.405941      |                     |                      |                  |
| COLISTIN              | GAPDH       | 19.8458347     | 19.3058395          |                      |                  |
| PIOGLITAZONE          | GAPDH       | 17.537138      |                     |                      |                  |
| PIOGLITAZONE          | GAPDH       | 17.6469975     |                     |                      |                  |
| PIOGLITAZONE          | GAPDH       | 17.8809566     | 17.688364           |                      |                  |
| COLISTIN+PIOGLITAZONE | GAPDH       | 17.6924362     |                     |                      |                  |
| COLISTIN+PIOGLITAZONE | GAPDH       | 18.035984      |                     |                      |                  |
| COLISTIN+PIOGLITAZONE | GAPDH       | 18.1472416     | 17.9585539          |                      |                  |

|                       |     |            |            |            |  |            |
|-----------------------|-----|------------|------------|------------|--|------------|
| CONTROL               | IL6 | 20.6284218 |            |            |  |            |
| CONTROL               | IL6 | 19.8800316 |            |            |  |            |
| CONTROL               | IL6 | 20.5978088 | 20.3687541 | 2.68263308 |  | 0          |
| COLISTIN              | IL6 | 20.9535313 |            |            |  |            |
| COLISTIN              | IL6 | 20.8759289 |            |            |  |            |
| COLISTIN              | IL6 | 21.4323559 | 20.9147301 | 1.60889053 |  | -1.0737425 |
| PIOGLITAZONE          | IL6 | 20.9662495 |            |            |  |            |
| PIOGLITAZONE          | IL6 | 21.2808361 |            |            |  |            |
| PIOGLITAZONE          | IL6 | 20.8925896 | 21.0465565 | 3.35819244 |  | 0.67555936 |
| COLISTIN+PIOGLITAZONE | IL6 | 20.8769855 |            |            |  |            |
| COLISTIN+PIOGLITAZONE | IL6 | 20.6166077 |            |            |  |            |
| COLISTIN+PIOGLITAZONE | IL6 | 19.6868019 | 20.393465  | 2.43491109 |  | -0.247722  |

Experiment 3

| Sample Name         | Target Name | C <sub>T</sub> | C <sub>T</sub> Mean | ΔC <sub>T</sub> Mean | ΔΔC <sub>T</sub> |
|---------------------|-------------|----------------|---------------------|----------------------|------------------|
| CONTROL             | GAPDH       | 18.6377888     |                     |                      |                  |
| CONTROL             | GAPDH       | 18.6271973     |                     |                      |                  |
| CONTROL             | GAPDH       | 18.7386112     | 18.6678658          |                      |                  |
| COLISTIN            | GAPDH       | 18.7298756     |                     |                      |                  |
| COLISTIN            | GAPDH       | 18.937273      |                     |                      |                  |
| COLISTIN            | GAPDH       | 18.9196301     | 18.8622595          |                      |                  |
| PIOGLITAZONE        | GAPDH       | 18.3623962     |                     |                      |                  |
| PIOGLITAZONE        | GAPDH       | 18.4261456     |                     |                      |                  |
| PIOGLITAZONE        | GAPDH       | 18.5009079     | 18.4298166          |                      |                  |
| COLISTIN+PIOGLITAZO | GAPDH       | 18.4545403     |                     |                      |                  |
| COLISTIN+PIOGLITAZO | GAPDH       | 18.3781567     |                     |                      |                  |
| COLISTIN+PIOGLITAZO | GAPDH       | 18.3848305     | 18.4058425          |                      |                  |
| CONTROL             | IL6         | 22.4492569     |                     |                      |                  |
| CONTROL             | IL6         | 22.7325134     |                     |                      |                  |
| CONTROL             | IL6         | 22.8792439     | 22.6870047          | 4.01913897           |                  |
| COLISTIN            | IL6         | 21.4214439     |                     |                      |                  |
| COLISTIN            | IL6         | 21.4548855     |                     |                      |                  |
| COLISTIN            | IL6         | 20.6240883     | 21.1668059          | 2.30454636           |                  |
| PIOGLITAZONE        | IL6         | 23.649229      |                     |                      |                  |
| PIOGLITAZONE        | IL6         | 23.2418156     |                     |                      |                  |
| PIOGLITAZONE        | IL6         | 23.093483      | 23.3281759          | 4.8983593            |                  |
| COLISTIN+PIOGLITAZO | IL6         | 21.808794      |                     |                      |                  |
| COLISTIN+PIOGLITAZO | IL6         | 21.6171017     |                     |                      |                  |
| COLISTIN+PIOGLITAZO | IL6         | 21.7353516     | 21.7204158          | 3.31457329           |                  |

Fold change

1

2.24436916

0.62054867

1.89468118

Fold change

1

2.10488666 pipette error

0.62608942

1.18733084

Fold change

1

3.28203953

0.54366116

1.62965399

Experiment 1

| Sample Name           | Target Name | C <sub>T</sub> | C <sub>T</sub> Mean | ΔC <sub>T</sub> Mean | ΔΔC <sub>T</sub> |
|-----------------------|-------------|----------------|---------------------|----------------------|------------------|
| CONTROL               | GAPDH       | 18.9729614     |                     |                      |                  |
| CONTROL               | GAPDH       | 18.7619667     |                     |                      |                  |
| CONTROL               | GAPDH       | 18.8933926     | 18.8761069          |                      |                  |
| COLISTIN              | GAPDH       | 18.9320698     |                     |                      |                  |
| COLISTIN              | GAPDH       | 18.9825706     |                     |                      |                  |
| COLISTIN              | GAPDH       | 18.9778538     | 18.9641647          |                      |                  |
| PIOGLITAZONE          | GAPDH       | 18.8215237     |                     |                      |                  |
| PIOGLITAZONE          | GAPDH       | 18.7138729     |                     |                      |                  |
| PIOGLITAZONE          | GAPDH       | 18.7213211     | 18.7522392          |                      |                  |
| COLISTIN+PIOGLITAZONE | GAPDH       | 18.6028061     |                     |                      |                  |
| COLISTIN+PIOGLITAZONE | GAPDH       | 18.7376232     |                     |                      |                  |
| COLISTIN+PIOGLITAZONE | GAPDH       | 18.7209702     | 18.6871332          |                      |                  |
| CONTROL               | TNFA        | 30.8138561     |                     |                      |                  |
| CONTROL               | TNFA        | 30.9263821     |                     |                      |                  |
| CONTROL               | TNFA        | 30.8778305     | 30.8726902          | 11.9965833           | 0                |
| COLISTIN              | TNFA        | 29.713068      |                     |                      |                  |
| COLISTIN              | TNFA        | 29.2030296     |                     |                      |                  |
| COLISTIN              | TNFA        | 29.3198509     | 29.4119816          | 10.4478168           | -1.5487665       |
| PIOGLITAZONE          | TNFA        | 30.8698921     |                     |                      |                  |
| PIOGLITAZONE          | TNFA        | 30.8078995     |                     |                      |                  |
| PIOGLITAZONE          | TNFA        | 30.9757595     | 30.8845158          | 12.1322765           | 0.13569323       |
| COLISTIN+PIOGLITAZONE | TNFA        | 29.7645531     |                     |                      |                  |
| COLISTIN+PIOGLITAZONE | TNFA        | 29.9231853     |                     |                      |                  |
| COLISTIN+PIOGLITAZONE | TNFA        | 30.1352673     | 29.9410019          | 11.2538687           | -0.7427146       |

| Sample Name           | Target Name | C <sub>T</sub> | C <sub>T</sub> Mean | ΔC <sub>T</sub> Mean | ΔΔC <sub>T</sub> |
|-----------------------|-------------|----------------|---------------------|----------------------|------------------|
| CONTROL               | GAPDH       | 17.9969864     |                     |                      |                  |
| CONTROL               | GAPDH       | 17.9918728     |                     |                      |                  |
| CONTROL               | GAPDH       | 17.9423103     | 17.9770565          |                      |                  |
| COLISTIN              | GAPDH       | 17.9900322     |                     |                      |                  |
| COLISTIN              | GAPDH       | 17.9255791     |                     |                      |                  |
| COLISTIN              | GAPDH       | 17.9504147     | 17.955342           |                      |                  |
| PIOGLITAZONE          | GAPDH       | 17.9449272     |                     |                      |                  |
| PIOGLITAZONE          | GAPDH       | 17.9594269     |                     |                      |                  |
| PIOGLITAZONE          | GAPDH       | 17.8851089     | 17.929821           |                      |                  |
| COLISTIN+PIOGLITAZONE | GAPDH       | 17.8323631     |                     |                      |                  |
| COLISTIN+PIOGLITAZONE | GAPDH       | 17.8825092     |                     |                      |                  |
| COLISTIN+PIOGLITAZONE | GAPDH       | 17.8618679     | 17.8589134          |                      |                  |
| CONTROL               | TNFA        | 30.8130379     |                     |                      |                  |

|                       |      |            |            |            |  |            |
|-----------------------|------|------------|------------|------------|--|------------|
| CONTROL               | TNFA | 30.6408787 |            |            |  |            |
| CONTROL               | TNFA | 30.3337498 | 30.5958888 | 12.6188323 |  | 0          |
| COLISTIN              | TNFA | 29.4375973 |            |            |  |            |
| COLISTIN              | TNFA | 29.3703003 |            |            |  |            |
| COLISTIN              | TNFA | 29.1089935 | 29.3056304 | 11.3502884 |  | -1.2685439 |
| PIOGLITAZONE          | TNFA | 30.9050865 |            |            |  |            |
| PIOGLITAZONE          | TNFA | 30.1912613 |            |            |  |            |
| PIOGLITAZONE          | TNFA | 30.3928051 | 30.4963843 | 12.5665633 |  | -0.052269  |
| COLISTIN+PIOGLITAZONE | TNFA | 29.9331779 |            |            |  |            |
| COLISTIN+PIOGLITAZONE | TNFA | 29.4170856 |            |            |  |            |
| COLISTIN+PIOGLITAZONE | TNFA | 29.9093475 | 29.7532037 | 11.8942903 |  | -0.724542  |

| Sample Name           | Target Name | C <sub>T</sub> | C <sub>T</sub> Mean | ΔC <sub>T</sub> Mean | ΔΔC <sub>T</sub> |
|-----------------------|-------------|----------------|---------------------|----------------------|------------------|
| CONTROL               | GAPDH       | 18.6377888     |                     |                      |                  |
| CONTROL               | GAPDH       | 18.6271973     |                     |                      |                  |
| CONTROL               | GAPDH       | 18.7386112     | 18.6678658          |                      |                  |
| COLISTIN              | GAPDH       | 18.7298756     |                     |                      |                  |
| COLISTIN              | GAPDH       | 18.937273      |                     |                      |                  |
| COLISTIN              | GAPDH       | 18.9196301     | 18.8622595          |                      |                  |
| PIOGLITAZONE          | GAPDH       | 18.3623962     |                     |                      |                  |
| PIOGLITAZONE          | GAPDH       | 18.4261456     |                     |                      |                  |
| PIOGLITAZONE          | GAPDH       | 18.5009079     | 18.4298166          |                      |                  |
| COLISTIN+PIOGLITAZONE | GAPDH       | 18.4545403     |                     |                      |                  |
| COLISTIN+PIOGLITAZONE | GAPDH       | 18.3781567     |                     |                      |                  |
| COLISTIN+PIOGLITAZONE | GAPDH       | 18.3848305     | 18.4058425          |                      |                  |
| CONTROL               | TNFA        | 31.3848324     |                     |                      |                  |
| CONTROL               | TNFA        | 31.2572613     |                     |                      |                  |
| CONTROL               | TNFA        | 31.2659016     | 31.3026651          | 12.6347993           |                  |
| COLISTIN              | TNFA        | 29.8788109     |                     |                      |                  |
| COLISTIN              | TNFA        | 29.9057121     |                     |                      |                  |
| COLISTIN              | TNFA        | 29.8534317     | 29.8793182          | 11.0170587           | -1.6177406       |
| PIOGLITAZONE          | TNFA        | 31.0093803     |                     |                      |                  |
| PIOGLITAZONE          | TNFA        | 30.9246044     |                     |                      |                  |
| PIOGLITAZONE          | TNFA        | 30.8835468     | 30.9391772          | 12.5093606           | -0.1254387       |
| COLISTIN+PIOGLITAZONE | TNFA        | 32.8270302     |                     |                      |                  |
| COLISTIN+PIOGLITAZONE | TNFA        | 30.7562714     |                     |                      |                  |
| COLISTIN+PIOGLITAZONE | TNFA        | 30.9722137     | 30.8642426          | 12.4584001           | -0.1763992       |



## Experiment 2

Fold change

1

2.92566879

0.91023235

1.67332139

Fold change

1

2.40918283

1.03689441

1.65237597

Fold change

1

3.06894041

1.09083938

1.13005989

## Experiment 3



| GEL 1                   | NFKB      | Beta actin | Normalized NFKB Expressic |
|-------------------------|-----------|------------|---------------------------|
| Control                 | 33681.702 | 33704.066  | 0.99933646                |
| Pioglitazone            | 41829.945 | 30728.187  | 1.361289067               |
| Colistin                | 29962.167 | 21884.995  | 1.369073514               |
| Colistin + Pioglitazone | 25012.823 | 27095.53   | 0.923134665               |

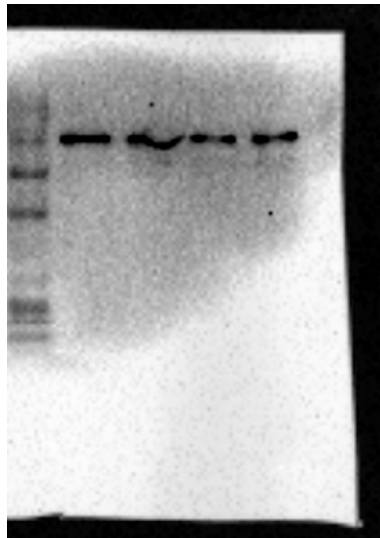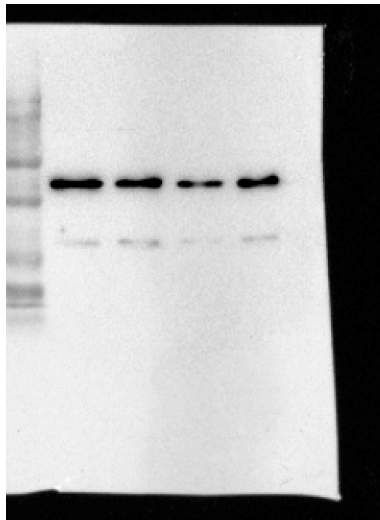

Fold Change Relative to Control

1  
1.362192936  
1.369982552  
0.923747608

| GEL 2                   | NFKB      | Beta actin |
|-------------------------|-----------|------------|
| Control                 | 40092.652 | 27183.551  |
| Pioglitazone            | 37308.702 | 33739.652  |
| Colistin                | 24888.066 | 9463.359   |
| Colistin + Pioglitazone | 26739.167 | 35471.48   |

|                         |           |           |
|-------------------------|-----------|-----------|
| Control                 | 23358.581 | 32774.924 |
| Pioglitazone            | 18711.53  | 32395.773 |
| Colistin                | 33816.087 | 23758.087 |
| Colistin + Pioglitazone | 8207.995  | 12364.137 |

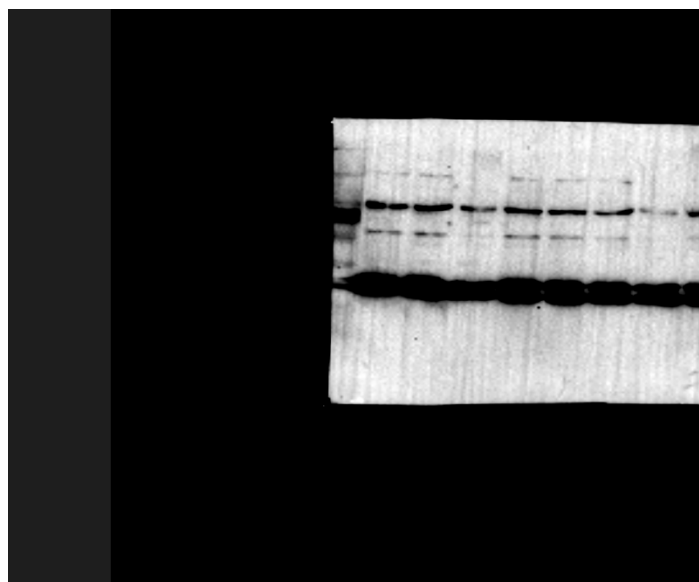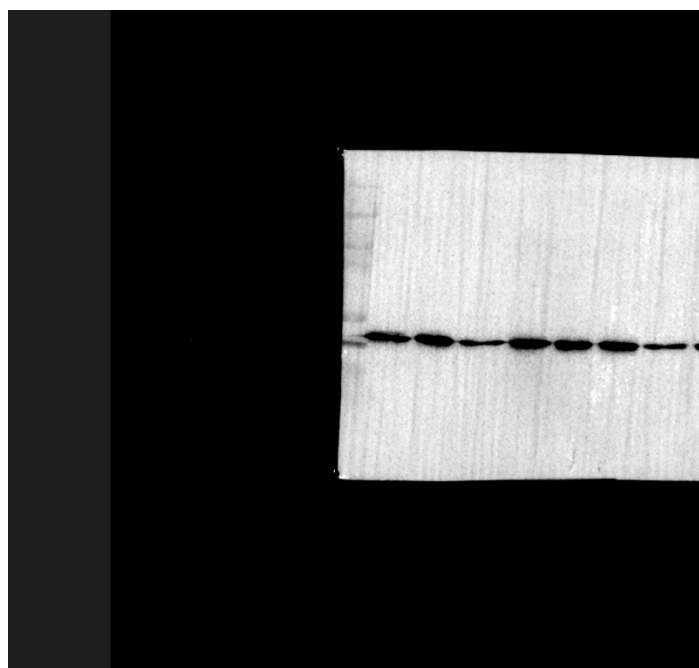

Normalized NFkB Expression Fold Change Relative to Control

|             |             |
|-------------|-------------|
| 1.474886486 | 0.999999997 |
| 1.105782063 | 0.749740452 |
| 2.629939961 | 1.783147367 |
| 0.753821577 | 0.511104809 |

|             |             |
|-------------|-------------|
| 0.712696725 | 1           |
| 0.577591712 | 0.810431271 |
| 1.423350584 | 1.997133611 |
| 0.663855067 | 0.931469227 |

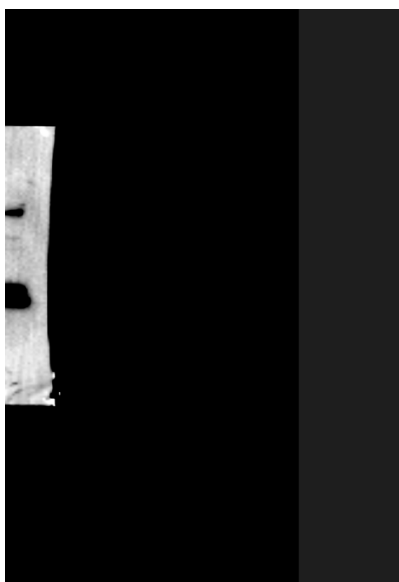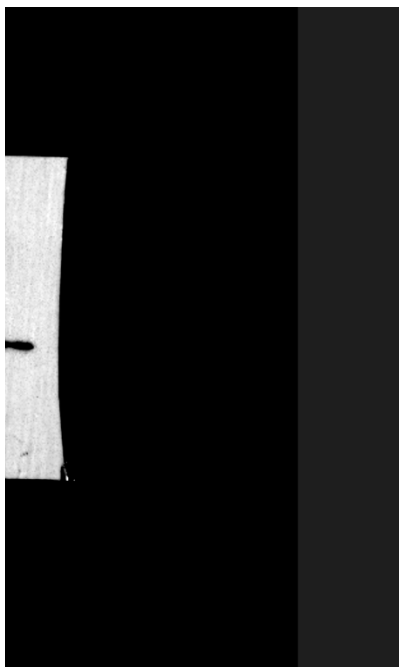

1 1.36219294 1.36998255 0.92374761  
1 0.74974045 1.78314737 0.51110481  
1 0.81043127 1.99713361 0.93146923



| GEL 1                   | NRF2      | GAPDH     | Normalized NRF2 Expression |
|-------------------------|-----------|-----------|----------------------------|
| Control                 | 30624.652 | 37747.681 | 0.811298898                |
| Pioglitazone            | 28682.116 | 32912.652 | 0.87146171                 |
| Colistin                | 12484.309 | 27185.187 | 0.459232044                |
| Colistin + Pioglitazone | 27199.38  | 23975.288 | 1.134475632                |

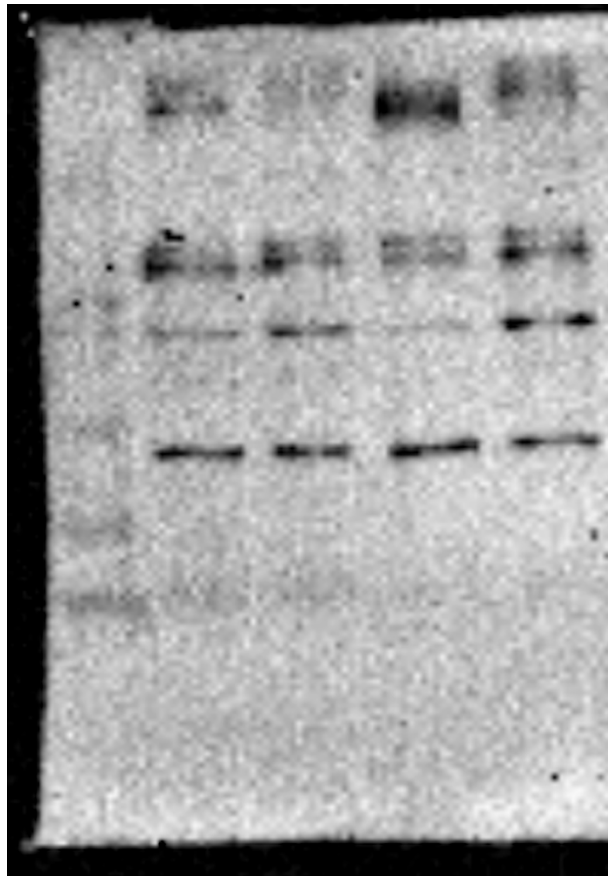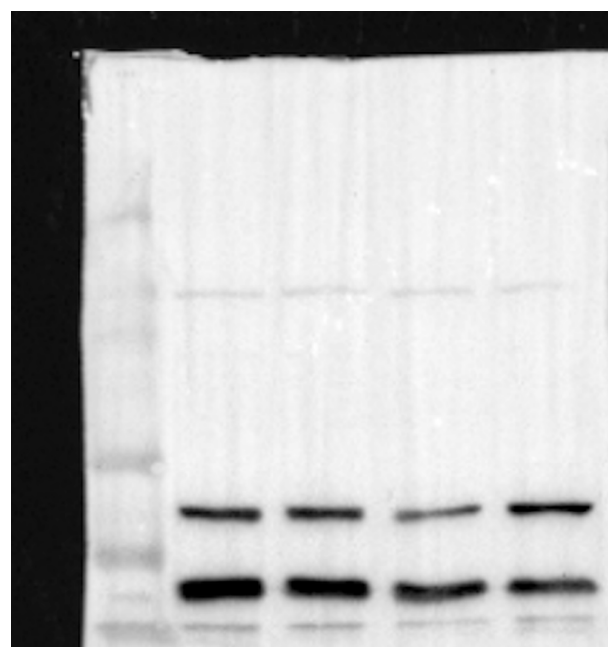

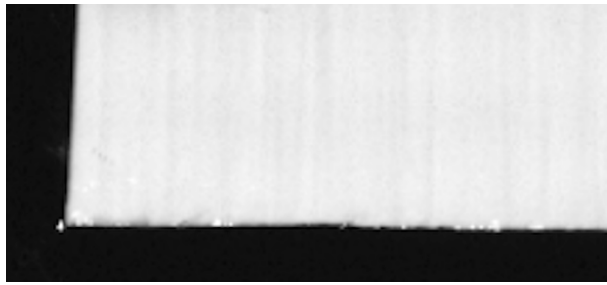

Fold Change Relative to Control

0.999999998

1.074156159

0.566045442

1.398344842

GEL 2

Control

Pioglitazone

Colistin

Colistin + Pioglitazone

Control

Pioglitazone

Colistin

Colistin + Pioglitazone

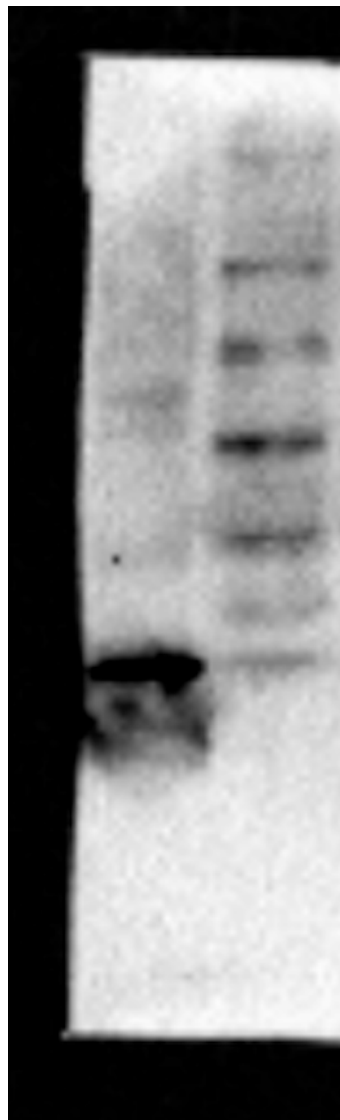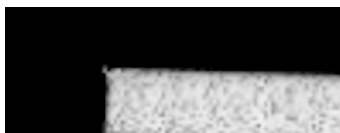

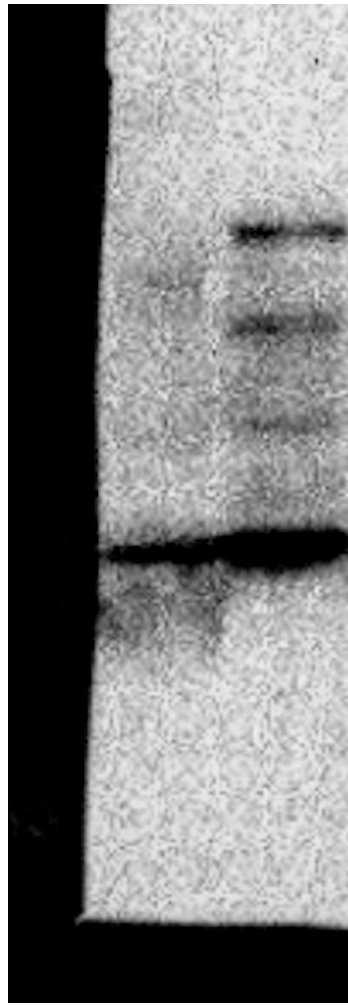

| NRF2      | GAPDH     | Normalized |
|-----------|-----------|------------|
| 31824.359 | 40063.359 | 0.79435074 |
| 33241.187 | 31287.773 | 1.06243378 |
| 3190.803  | 17463.823 | 0.18270931 |
| 33250.945 | 35812.409 | 0.92847552 |
| 30430.116 | 44300.459 | 0.68690295 |
| 30209.924 | 36893.581 | 0.81883957 |
| 12164.752 | 30944.016 | 0.39312131 |
| 19469.116 | 36250.48  | 0.53707195 |

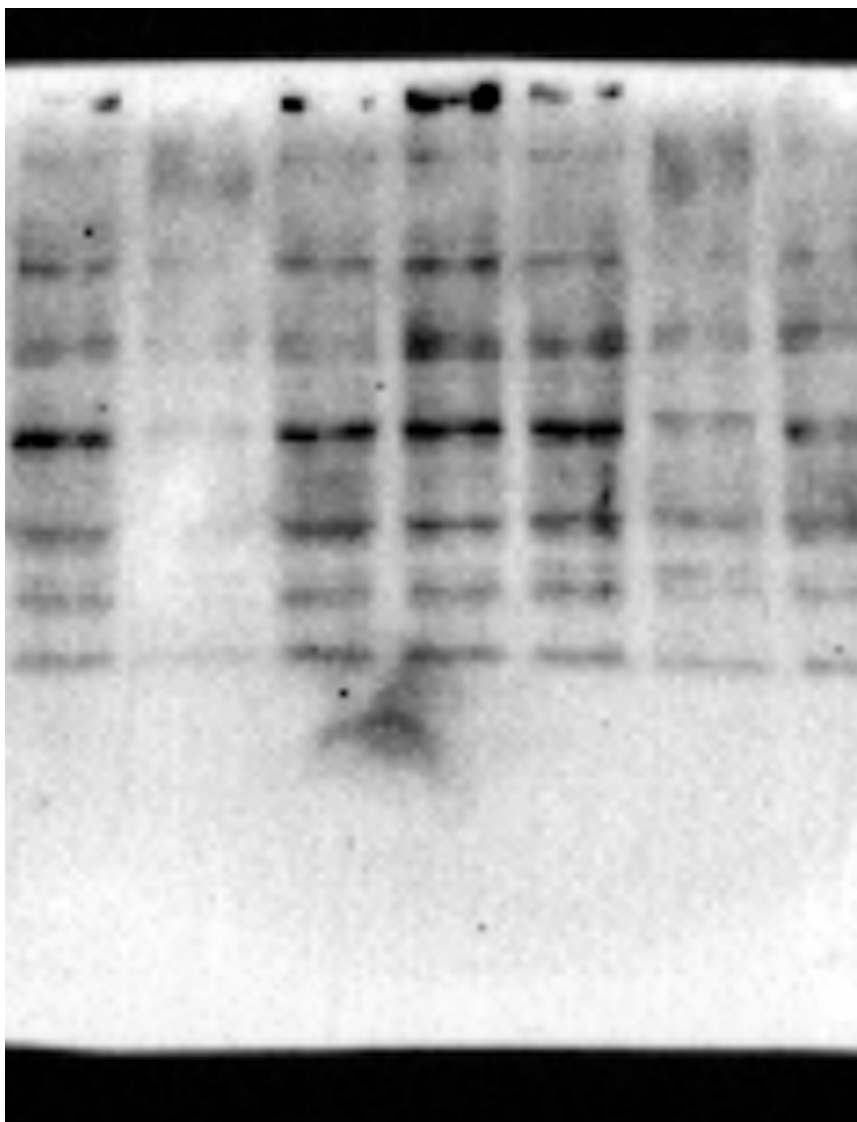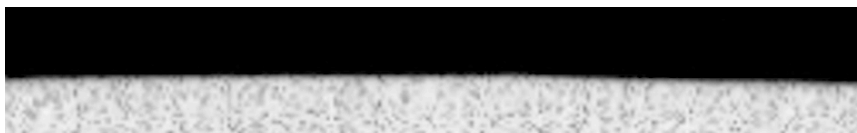

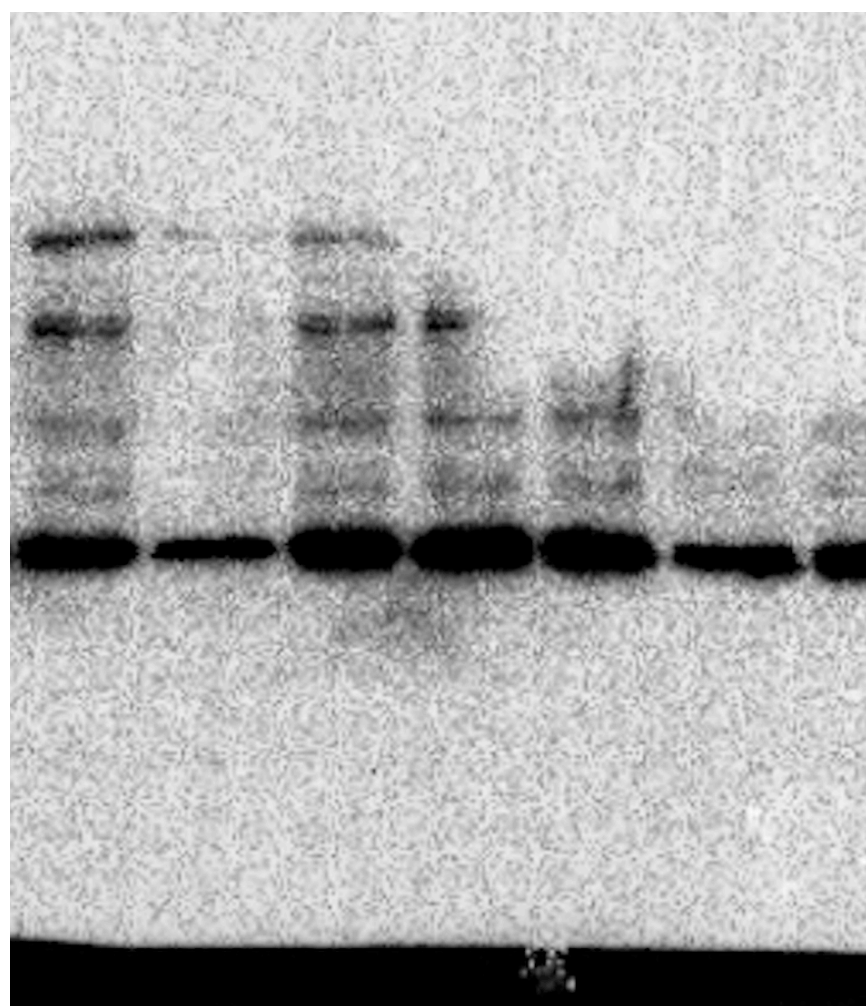

Fold Change Relative to Control

1.000000004

1.337486992

0.230010873

1.168848308

1.000000001

1.192074615

0.572309824

0.781874573

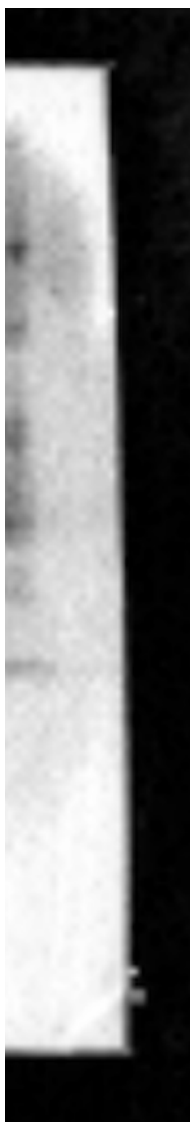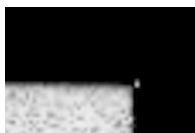

Supplement: pone.0314092.s002.pdf [file pone.0314092.s002.pdf]
